# Supplementary material for: Fe3O4@polydopamine and Exo III-assisted homogeneous biorecognition reaction for convenient and ultrasensitive detection of kanamycin antibiotic
Source: Royal Society of Chemistry journal article supplement (doi:10.1039/d0an02187c), 2020-12-17
Supplement: d0an02187c1.pdf [file d0an02187c1.pdf]

Electronic Supplementary Information (ESI) for Analyst

This journal is (c) The Royal Society of Chemistry 2020

**Fe<sub>3</sub>O<sub>4</sub>@polydopamine and Exo III-assisted homogeneous  
biorecognition reaction for convenient and ultrasensitive detection  
of kanamycin antibiotic**

Chuanying Qin,<sup>a</sup> Cong Hu,<sup>a</sup> Aimin Yu<sup>b</sup> and Guosong Lai<sup>\*a</sup>

*<sup>a</sup> Hubei Key Laboratory of Pollutant Analysis & Reuse Technology, College of Chemistry and  
Chemical Engineering, Hubei Normal University, Huangshi 435002, PR China*

*<sup>b</sup> Department of Chemistry and Biotechnology, Faculty of Science, Engineering and  
Technology, Swinburne University of Technology, Hawthorn VIC 3122, Australia*

\* Corresponding Author.

*E-mail address:* gslai@hbnu.edu.cn (G. Lai)

*Phone:* +86-714-6515602.

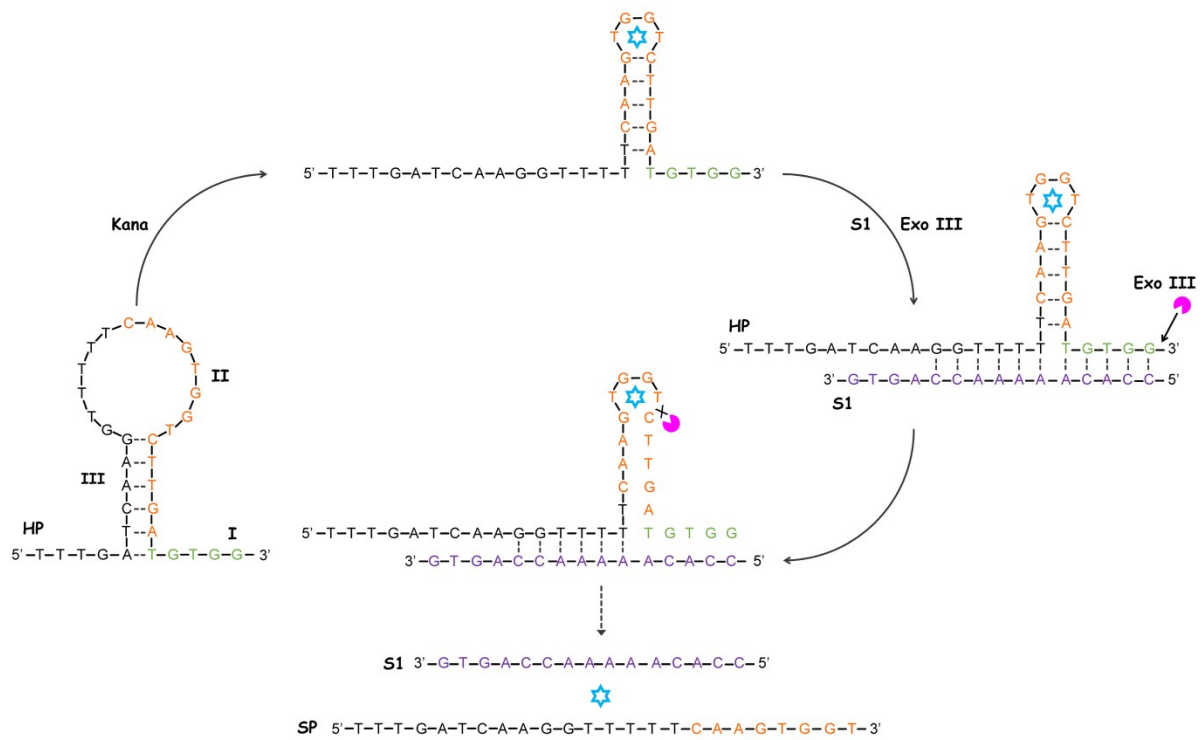

**Fig. S1** Schematic illustration of the base sequence design of HP to show the target-biorecognition triggered release of SP under the assistance of the enzymatic reaction of Exo III

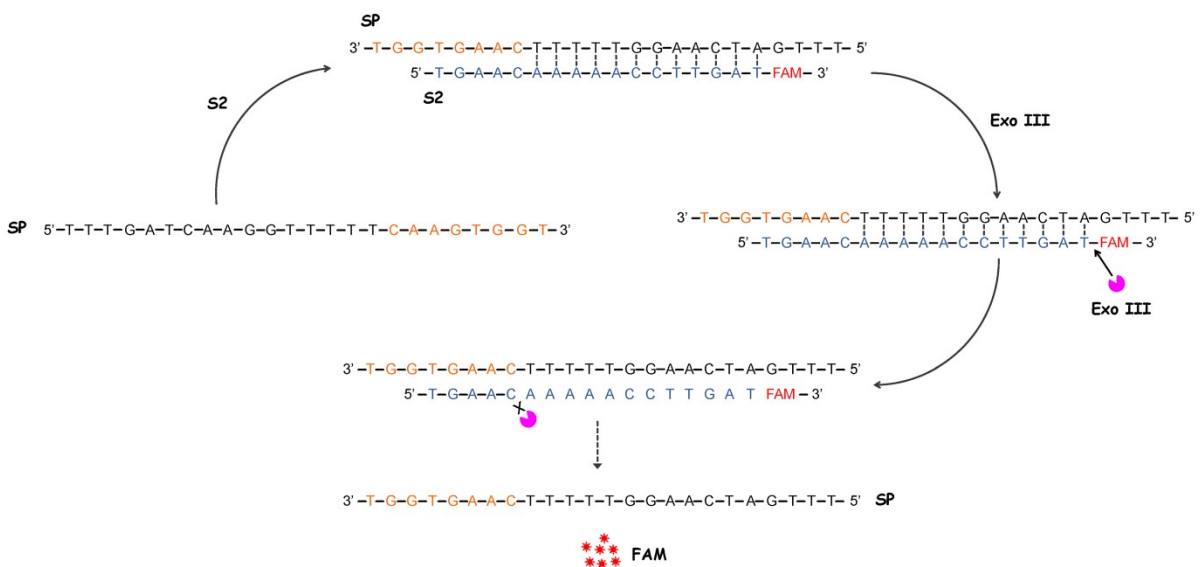

**Fig. S2** Schematic illustration of the DNA hybridization between SP and S2 for triggering the Exo III-catalyzed digestion of S2 to release FAM labels

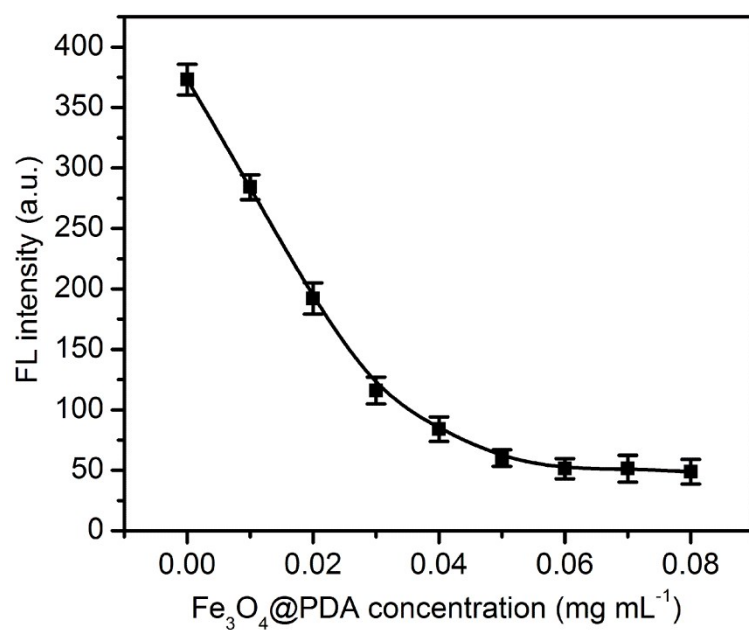

**Fig. S3** Effect of the Fe<sub>3</sub>O<sub>4</sub>@PDA concentration on the fluorescence signal response of 1.0 μM S2

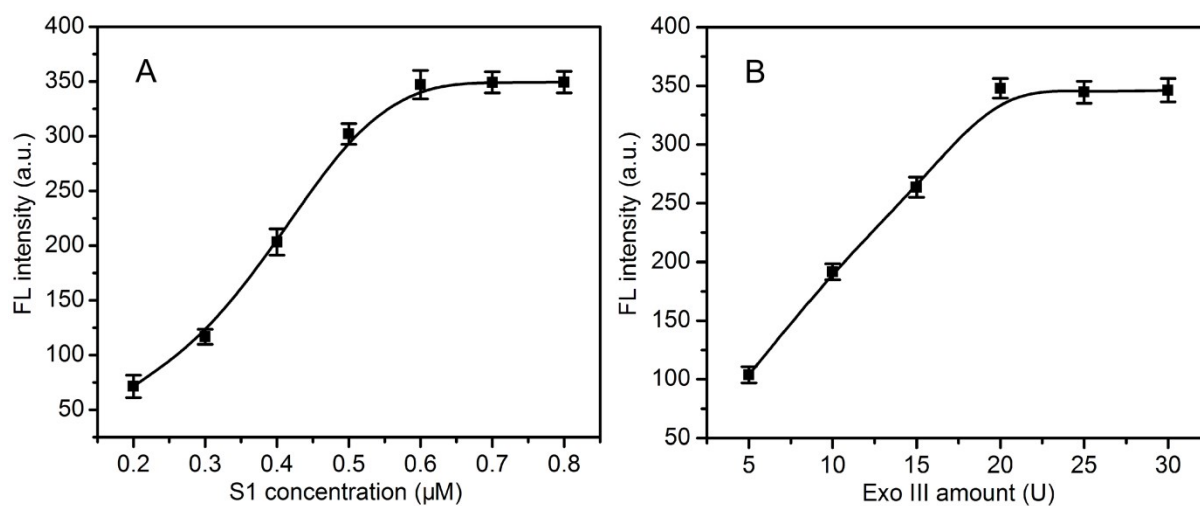

**Fig. S4** Effects of the S1 concentration (A) and Exo III amount (B) on the fluorescence signal responses of 100 ng mL<sup>-1</sup> Kana

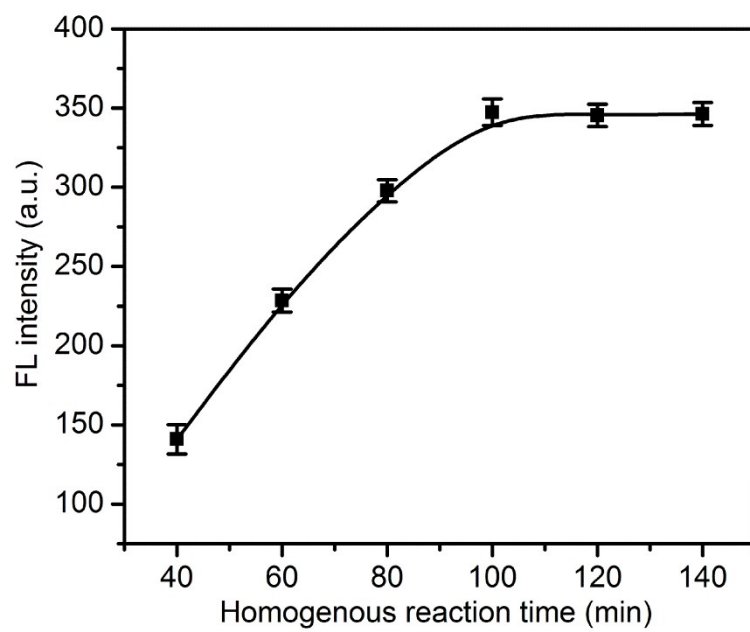

**Fig. S5** Effect of the homogeneous reaction time on the fluorescence signal response of 100 ng mL<sup>-1</sup> Kana

**Table S1** The overview on the specific features of the biosensing methods previously reported for Kana detection

| Detection method | Signal transduction strategy                                                                                                 | Linear range                                      | LOD                       | Ref.      |
|------------------|------------------------------------------------------------------------------------------------------------------------------|---------------------------------------------------|---------------------------|-----------|
| Colorimetric     | Aptamer biorecognition-triggered DNAzyme liberation for colorimetric analysis                                                | 0.1 pg mL <sup>-1</sup> – 10 ng mL <sup>-1</sup>  | 0.045 pg mL <sup>-1</sup> | 6         |
| Fluorescent      | Aptamer biorecognition-induced polymerase-catalyzed amplification for ratiometric fluorescent signal output                  | 1–80 nM                                           | 0.29 nM                   | 17        |
| Fluorescent      | Aptamer biorecognition-regulated surface plasmon enhanced energy transfer between silver nanoclusters and gold nanoparticles | 5–50 nM                                           | 1 nM                      | 21        |
| Electrochemical  | Aptamer biorecognition-induced electrochemical signal decrease of a graphene-thionine nanocomposite modified electrode       | 0.5 pg mL <sup>-1</sup> – 50 ng mL <sup>-1</sup>  | 0.42 pg mL <sup>-1</sup>  | 36        |
| Electrochemical  | Aptamer biorecognition-induced electrochemical signal response of Au@Pt core-shell nanoparticles labeled by thionine         | 1 pM–1 μM                                         | 0.16 pM                   | 37        |
| Colorimetric     | Aptamer biorecognition-triggered hairpin switch and nicking enzyme-cleaved release of platinum nanoparticle probe            | 0.5 pg mL <sup>-1</sup> – 200 ng mL <sup>-1</sup> | 0.2 pg mL <sup>-1</sup>   | 38        |
| Fluorescent      | Aptamer biorecognition-triggered three-dimensional DNA walking to release dye labels                                         | 5–2000 pM                                         | 1.23 pM                   | 39        |
| Fluorescent      | Fe <sub>3</sub> O <sub>4</sub> @PDA and Exo III-assisted aptamer biorecognition reaction to release dye labels               | 0.1 pg mL <sup>-1</sup> – 100 ng mL <sup>-1</sup> | 0.023 pg mL <sup>-1</sup> | This Work |
